# Supplementary material
Source: PubMed Central journal article supplement (PMC3683836)

# Supplemental Material

## Figure S7: Bone marrow

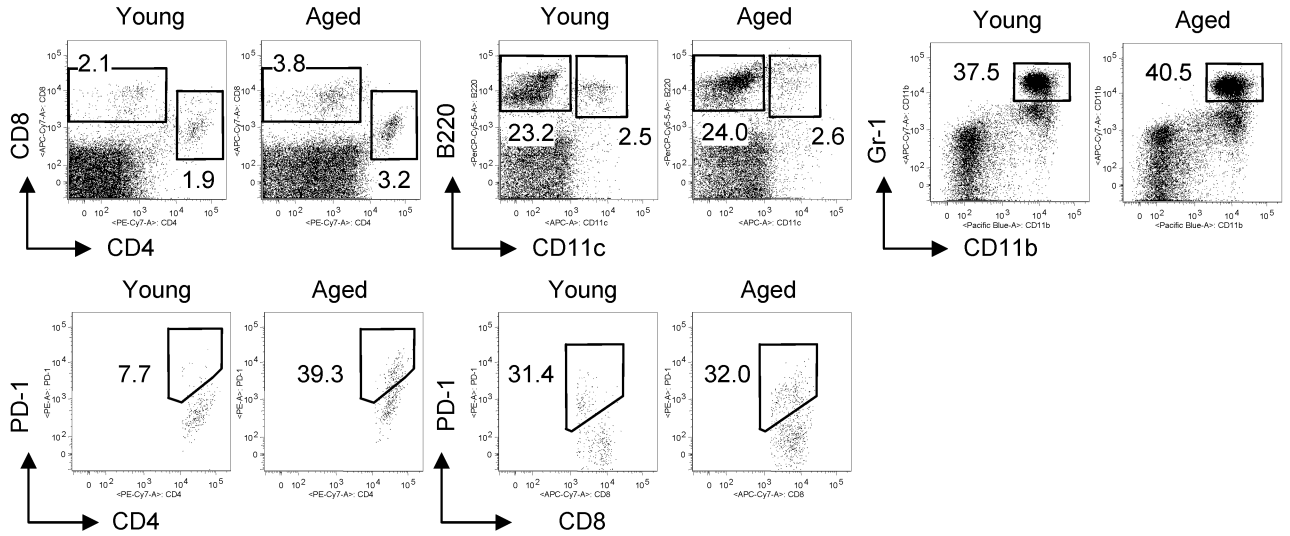

## Figure S8: Bone marrow

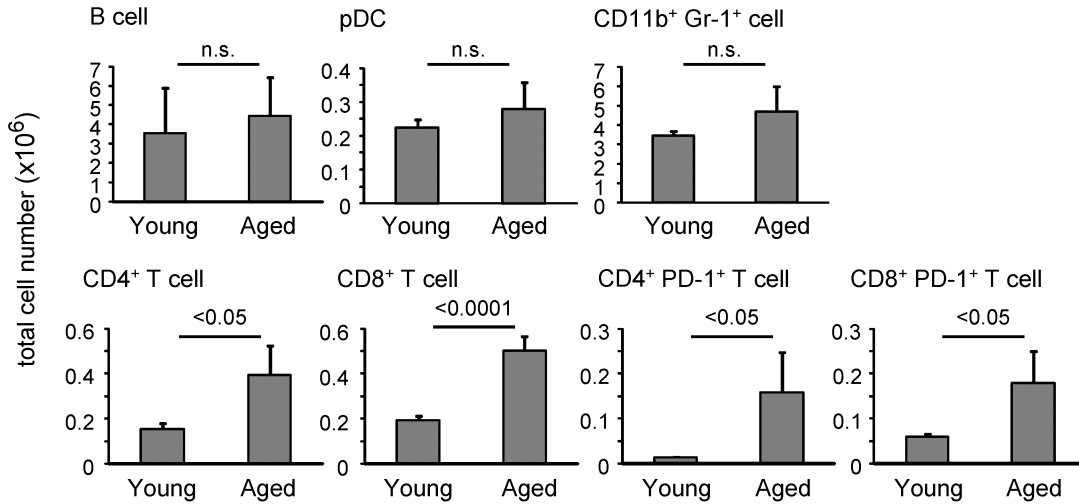

## Figure S9

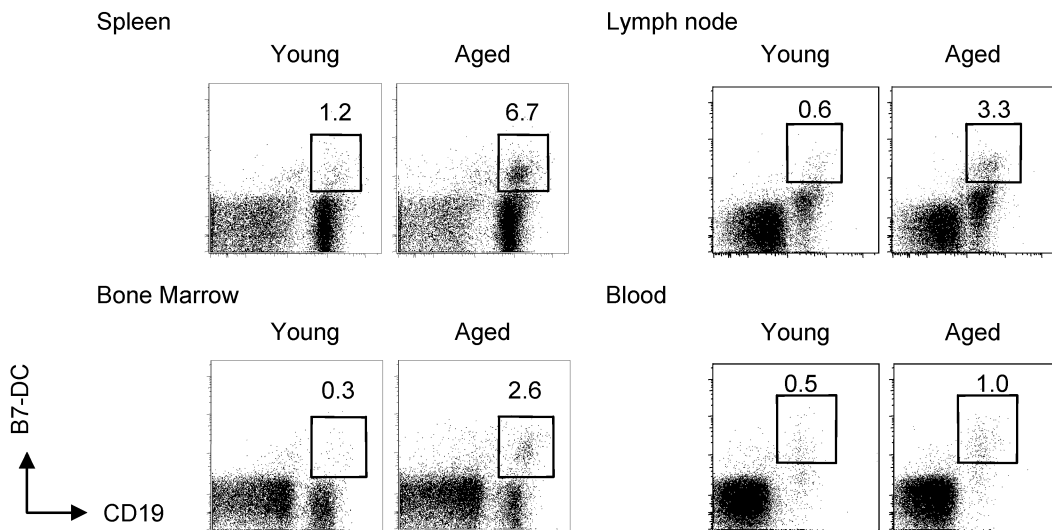

Figure S10

Spleen

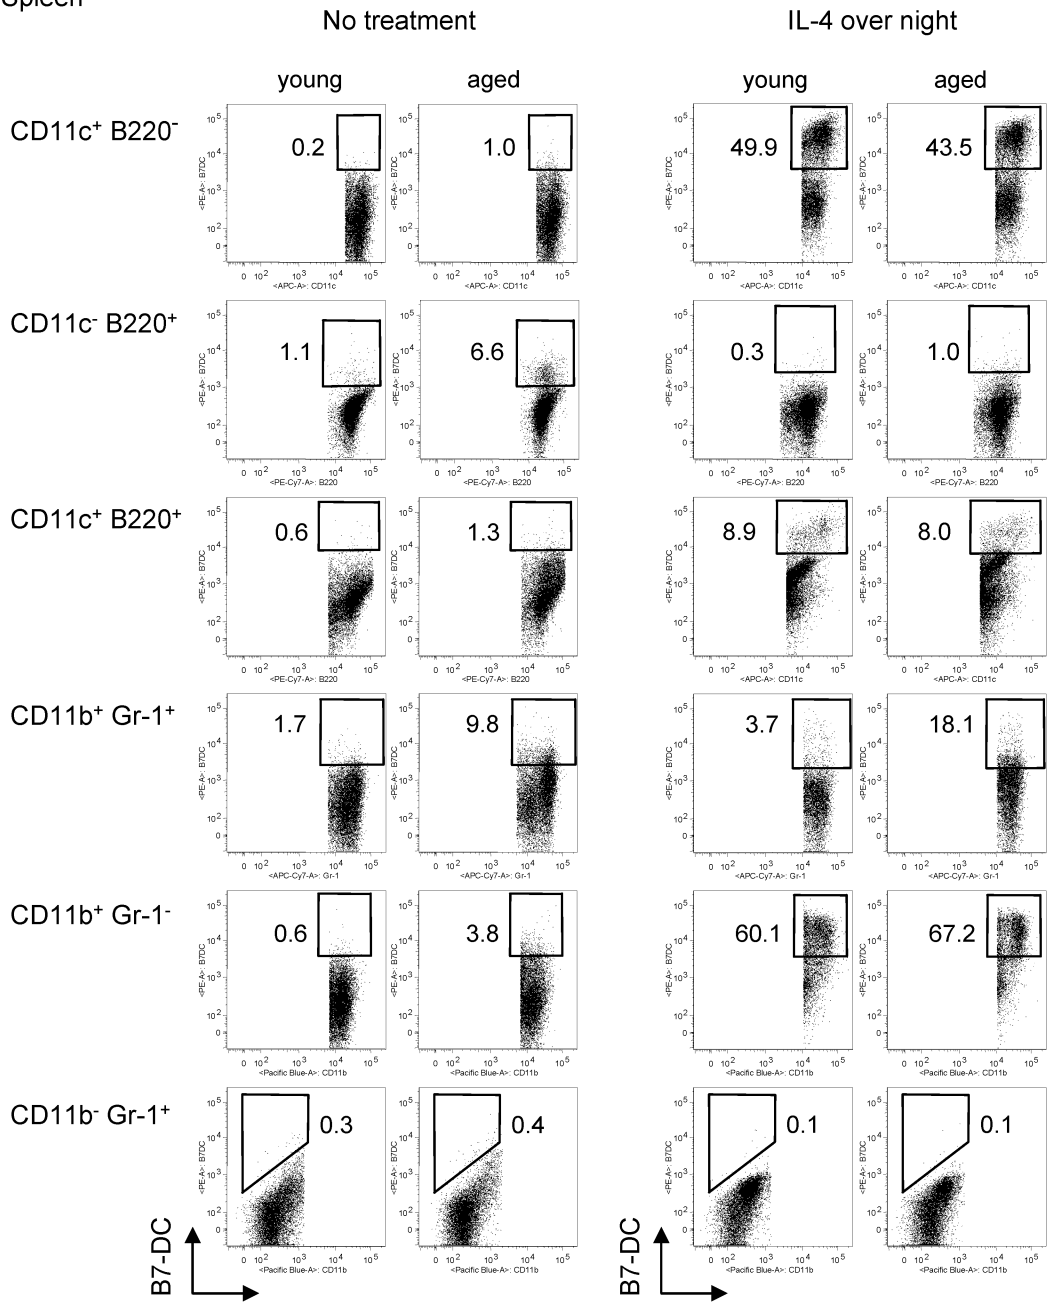

# Supplemental Material

Figure S11

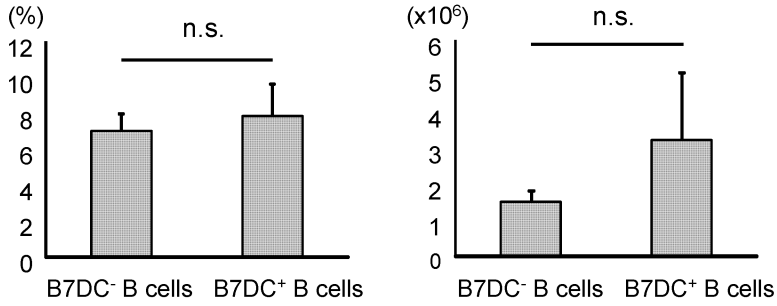

Figure S12

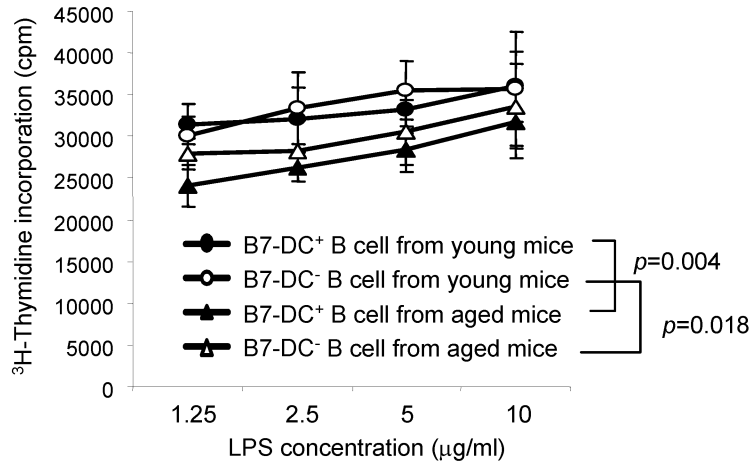

Figure S13

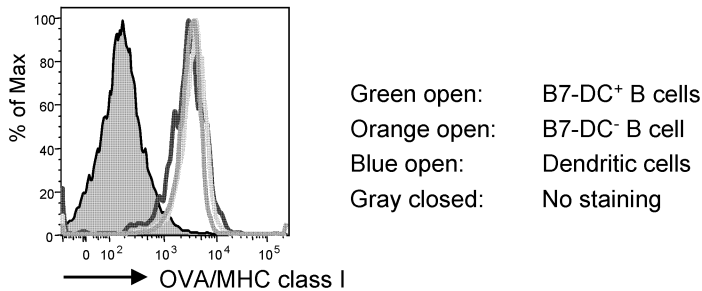

Figure S14

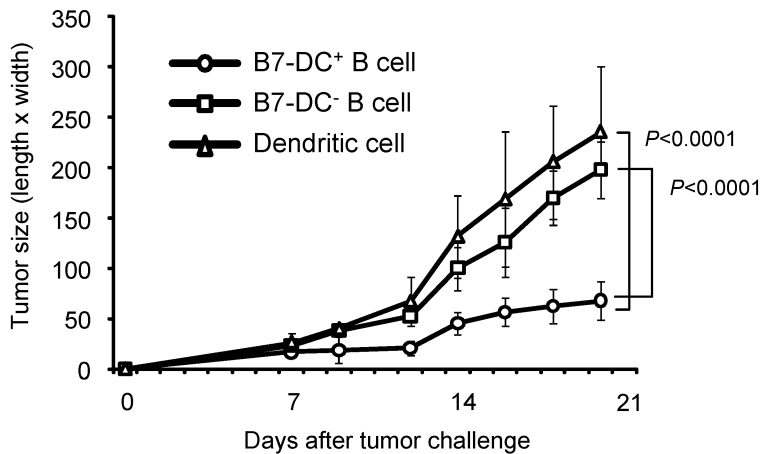

# Supplemental Material

Figure S4: Lymph node

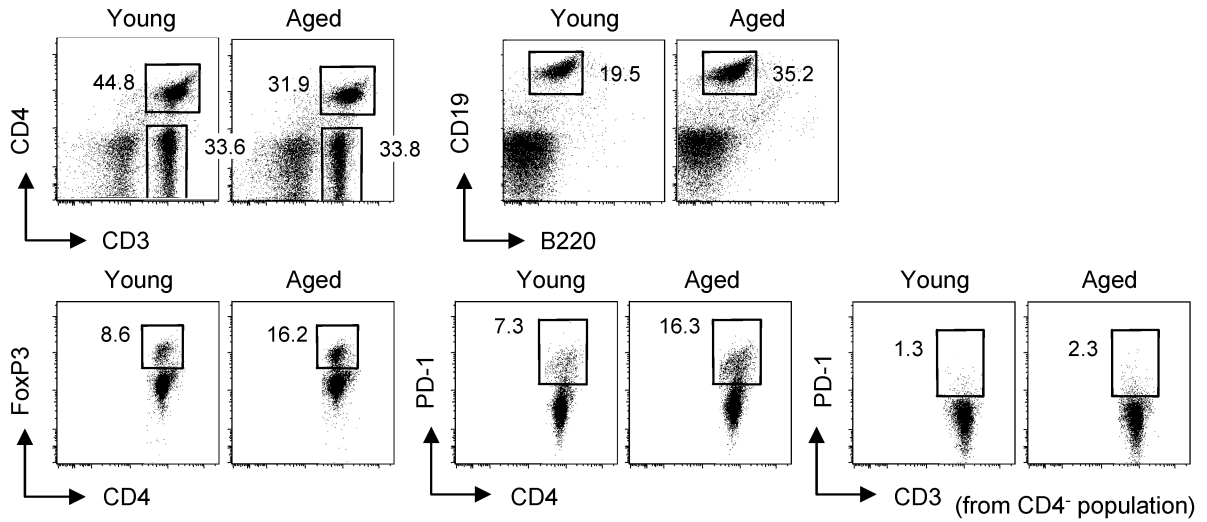

Figure S5: Lymph node

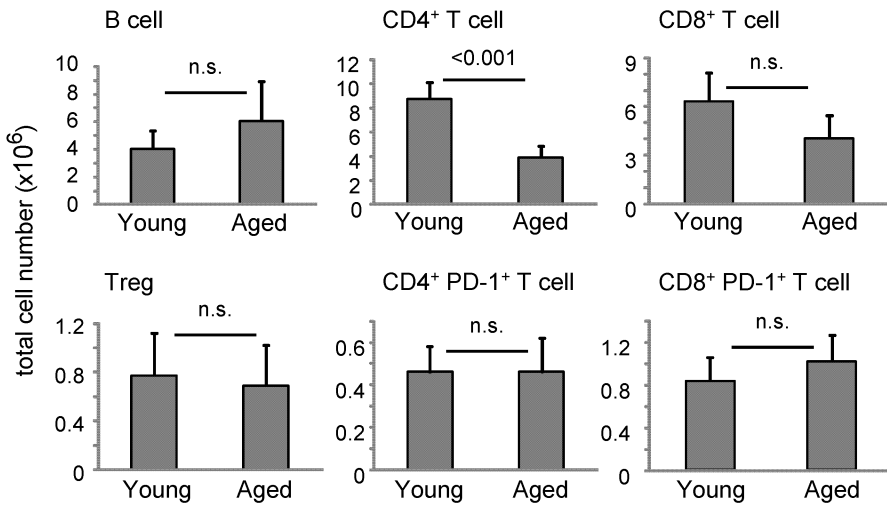

Figure S6: Peripheral blood

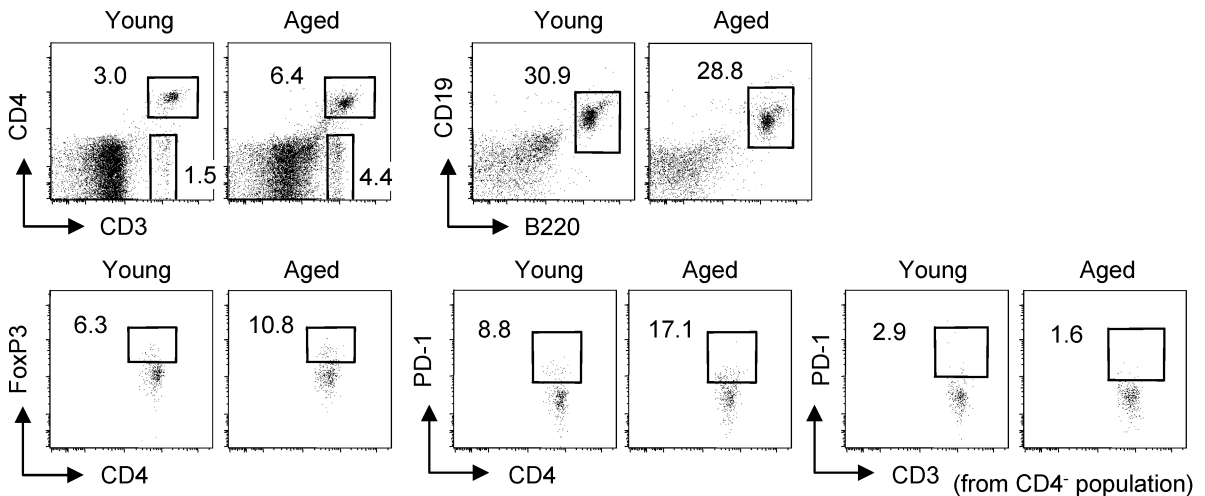

# Supplemental Material

## Figure S1

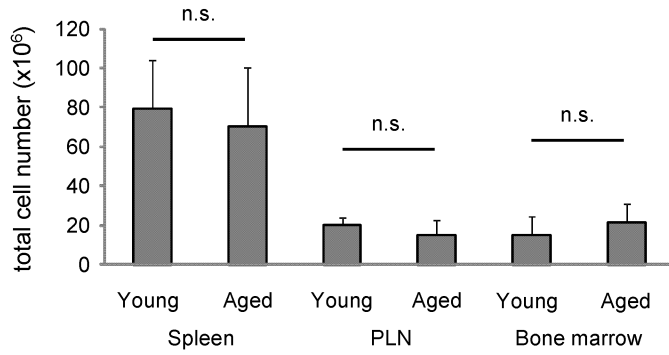

## Figure S2: Spleen

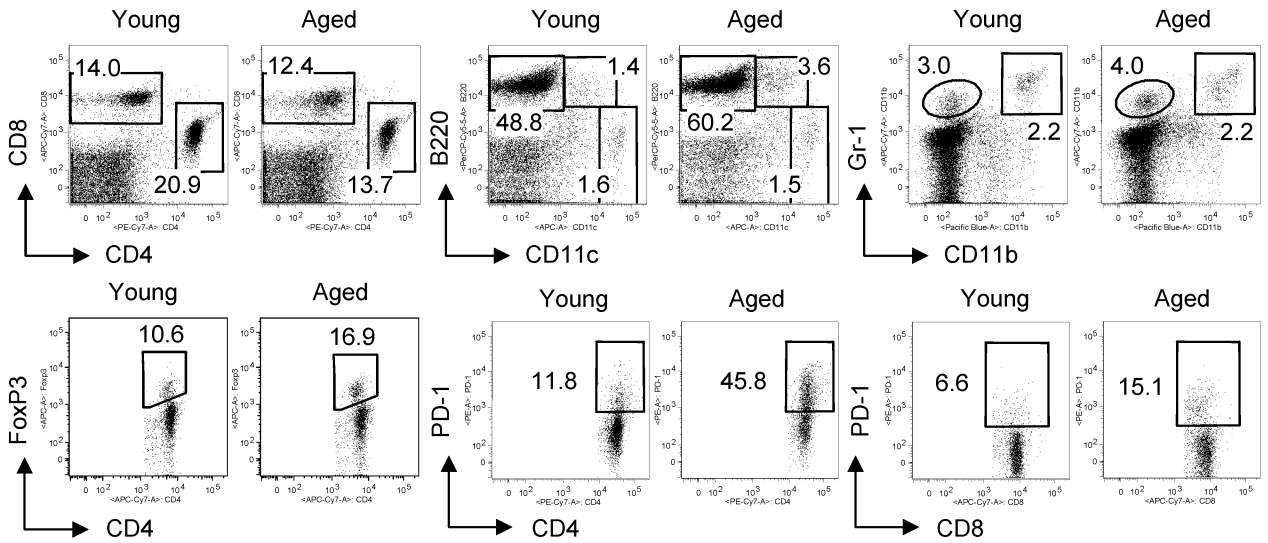

## Figure S3: Spleen

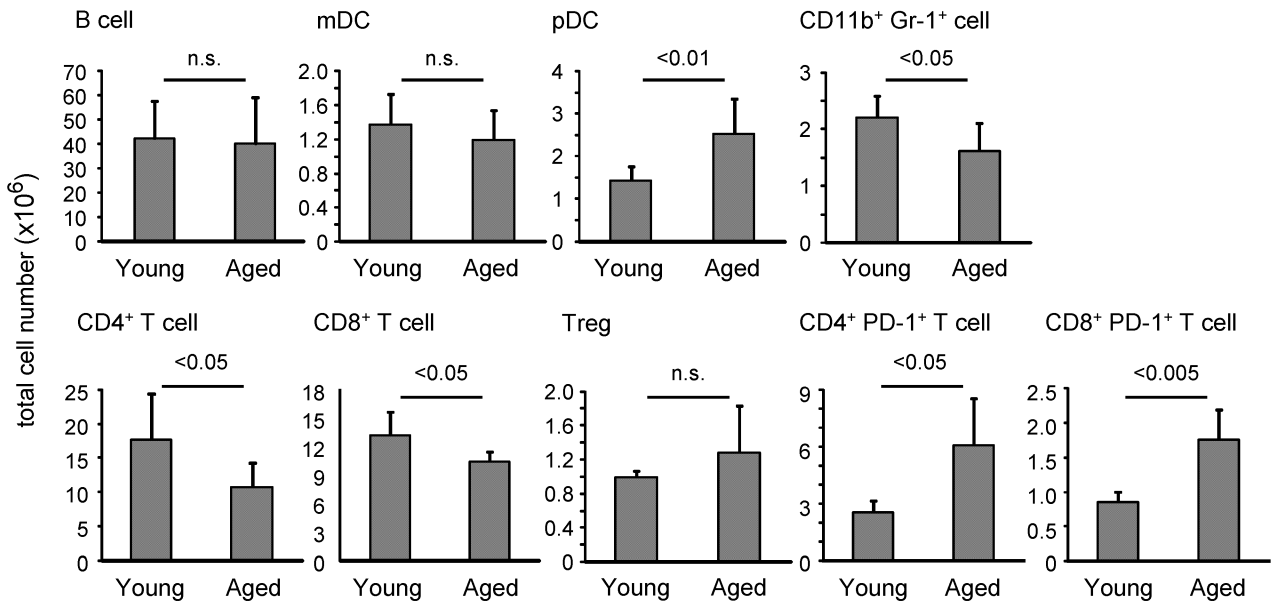

Supplement: NIHMS441096-supplement-Supplement1.pdf [file NIHMS441096-supplement-Supplement1.pdf]
